# Supplementary material for: Analysis of bacteria-challenged wild silkmoth, Antheraea mylitta (lepidoptera) transcriptome reveals potential immune genes
Source: PubMed Central journal article supplement (PMC1559613; doi:10.1186/1471-2164-7-184), 2006-07-21
Supplement: 1471-2164-7-184-S2.pdf [file 1471-2164-7-184-S2.pdf]

**Additional data file 2: ProDom based functional annotation of clusters, which had no hits, or showed similarity with unknown/hypothetical proteins in NCBI BLAST.**

\*- Sequences can be accessed at <http://210.212.212.7:9999/PHP/SILKSAT/uniqueseqs/>.

| No. | Cluster Name*                                         | ProDom Domains                                               | ProDom Accession Number |
|-----|-------------------------------------------------------|--------------------------------------------------------------|-------------------------|
| 1   | amfbcontig0019                                        | No hits                                                      |                         |
| 2   | amfbcontig0035                                        | No hits                                                      |                         |
| 3   | amfbcontig0038                                        | No hits                                                      |                         |
| 4   | amfbcontig0043                                        | Ribosome associated membrane RAMP4                           | PD054374                |
| 5   | amfbcontig0051                                        | Phosphoribosyltransferase                                    | PD001439                |
| 6   | amfbcontig0060                                        | CG14984-A                                                    | PD306867                |
| 7   | amfbcontig0061                                        | No hits                                                      |                         |
| 8   | amfbcontig0066                                        | Glycoside Hydrolase 29 (Alpha-L-Fucosidase)                  | PD886685                |
| 9   | amfbcontig0070                                        | Aminotransferase class-III                                   | PD000493                |
| 10  | amfbcontig0072,<br>amfb0294                           | CG33290-PA CG14567 <i>D. melanogaster</i>                    | PD308577                |
| 11  | amfbcontig0077                                        | CG16926 <i>D. melanogaster</i>                               | PD927175                |
| 12  | amfbcontig0091                                        | Repressor E1a-stimulated genes                               | PD152511                |
| 13  | amfbcontig0092                                        | No hits                                                      |                         |
| 14  | amfbcontig0093,<br>amfbcontig0104                     | Ubiquitin-conjugating enzyme, E2                             | PD000461                |
| 15  | amfbcontig0094                                        | Tubulin binding cofactor A                                   | PD010430                |
| 16  | amfbcontig0095,<br>amfb0124                           | AICARFT/IMPCHase bienzyme                                    | PD004666                |
| 17  | amfbcontig0096                                        | No hits                                                      |                         |
| 18  | amfbcontig0099                                        | Transmembrane precursor signal TMP21 P23                     | PD035860                |
| 19  | amfbcontig0101                                        | Major royal jelly protein                                    | PD014382                |
| 20  | amfbcontig0108                                        | DEAD/DEAH box helicase                                       | PD000033                |
| 21  | amfbcontig0111                                        | 3-Hydroxyacyl-CoA Dehydrogenase, NAD-binding                 | PD003524                |
| 22  | amfbcontig0115                                        | PF08_0013                                                    | PD813653                |
| 23  | amfbcontig0116                                        | Initiation factor subunit                                    | PD444660                |
| 24  | amfbcontig0121                                        | Actin binding factor                                         | PD129211                |
| 25  | amfbcontig0122                                        | No hits                                                      |                         |
| 26  | amfbcontig0130                                        | Nudix bifunctional Pyrrolidone Carboxyl                      | PD828714                |
| 27  | amfbcontig0132                                        | Hydrolase Nitrilase Carbon-Nitrogen<br>Amidohydrolase Family | PD052217                |
| 28  | amfbcontig0134                                        | L27, Homologue LIN-7 VELI LIN MUS C                          | PD154569                |
| 29  | amfbcontig0136,<br>amfb0145,<br>amfb0354,<br>amfb0391 | CHCC Zinc -finger domain                                     | PD690711,<br>PD321788   |

|    |                                                      |                                                                  |                       |
|----|------------------------------------------------------|------------------------------------------------------------------|-----------------------|
| 30 | amfbcontig0140                                       | Aldehyde cytosolic Dehydrogenase                                 | PDA1A9N1              |
| 31 | amfbcontig0144                                       | Cysteine twelve <i>M. sexta</i>                                  | PD548193              |
| 32 | amfbcontig0146                                       | Whey acidic protein core region                                  | PD026912              |
| 33 | amfbcontig0147                                       | Calcium-binding EF-hand                                          | PD000012              |
| 34 | amfbcontig0149                                       | Kinase Transferase ATP-binding serine/threonine-protein          | PD119917              |
| 35 | amfbcontig0153,<br>amfb1024                          | RNA-directed RNA Polymerase, P3D protein (polyprotein coat core) | PD686877              |
| 36 | amfbcontig0155                                       | Synthetase metal-binding                                         | PD606972              |
| 37 | amfbcontig0156                                       | Purine Phosphorylase 2                                           | PD006911              |
| 38 | amfbcontig0157                                       | Histone H3                                                       | PD000978              |
| 39 | amfbcontig0158                                       | No hits                                                          |                       |
| 40 | amfbcontig0160,<br>amfb1194,                         | Factor LPS –induced enriched library endosome                    | PD015270              |
| 41 | amfbcontig0161,<br>amfb0152,<br>amfb424,<br>afmb0661 | ATP dependent RNA Helicase                                       | PD035460,<br>PD035498 |
| 42 | amfbcontig0162                                       | ADP-specific Phospho Fructokinase/Glucokinase conserved region   | PD257594              |
| 43 | amfbcontig0166,<br>amfb0411                          | ABC transporter                                                  | PD000006              |
| 44 | amfb0026                                             | No hits                                                          |                       |
| 45 | amfb0034                                             | Carbohydrate Kinase, FGGY                                        | PD684127              |
| 46 | amfb0039                                             | No hits                                                          |                       |
| 47 | amfb0047                                             | CG15211-PA RE01453P                                              | PD306644              |
| 48 | amfb0061                                             | No hits                                                          |                       |
| 49 | amfb0065                                             | Synaptobrevin                                                    | PD001229              |
| 50 | amfb0067                                             | GTP-binding elongation factor                                    | PD011419              |
| 51 | amfb0068                                             | No hits                                                          |                       |
| 52 | amfb0081                                             | Peptidase C12, Ubiquitin carboxyl-terminal Hydrolase 1           | PD350662              |
| 53 | amfb0082                                             | Fasciculation elongation Zeta Zygin I Coiled Coil                | PD011714              |
| 54 | amfb0095                                             | WD-40 repeat                                                     | PD320067              |
| 55 | amfb0101                                             | Carboxyl Esterase activity                                       | PD000713              |
| 56 | amfb0106                                             | Intra cellular protein transport                                 | PD242575              |
| 57 | amfb0128                                             | No hits                                                          |                       |
| 58 | amfb0135                                             | CG7221-PA                                                        | PD622051              |
| 59 | amfb0144                                             | Receptor 20E ecdysone                                            | PD065649              |
| 60 | amfb0168                                             | Aldo/Keto reductase                                              | PD000288              |
| 61 | amfb0173,<br>amfb0296                                | RNA binding ribonuclear protein                                  | PD150747              |
| 62 | amfb0175                                             | Synapse-Associated Sap47                                         | PD022947              |
| 63 | amfb0178                                             | No hits                                                          |                       |
| 64 | amfb0180                                             | Heme Peroxidase                                                  | PD564465              |

|    |                                                 |                                                                                               |           |
|----|-------------------------------------------------|-----------------------------------------------------------------------------------------------|-----------|
| 65 | amfb0185                                        | No hits                                                                                       |           |
| 66 | amfb0195,<br>amfb0679                           | NADH-Ubiquinone (oxidoreductase ubiquinone)                                                   | PD072136  |
| 67 | amfb0197                                        | NAD-dependent Epimerase /Dehydratase                                                          | PD291388  |
| 68 | amfb0199                                        | No hits                                                                                       |           |
| 69 | amfb0203,<br>amfb1283,<br>amfb0022,<br>amfb1002 | RNA-binding region RNP-1 (RNA recognition motif)                                              | PD706470  |
| 70 | amfb0205                                        | CCR-4 associated factor                                                                       | PD878878  |
| 71 | amfb0206                                        | 1-(5-Phosphoribosyl)-5-amino-4-imidazole-carboxylate (AIR) Carboxylase                        | PD002193  |
| 72 | amfb0213,<br>amfb0426,<br>amfb1367              | Ras GTPase                                                                                    | PD000015, |
| 73 | amfb0214                                        | Flavoprotein Oxidoreductase                                                                   | PD115662  |
| 74 | amfb0221,<br>amfb0879                           | Beta-3 Karyopherin repeat                                                                     | PD606523  |
| 75 | amfb0229,<br>amfb1150                           | Cytochrome b5                                                                                 | PD000612  |
| 76 | amfb0233                                        | No hits                                                                                       |           |
| 77 | amfb0241                                        | Kinase receptor HTK32 Transferase                                                             | PD323132  |
| 78 | amfb0242                                        | Glutamate-cysteine Ligase catalytic subunit                                                   | PD235481  |
| 79 | amfb0244                                        | UPF3 HUPF3A Homolog                                                                           | PD121682  |
| 80 | amfb0250                                        | Reticulon                                                                                     | PD186266  |
| 81 | amfb0263                                        | Short-chain Dehydrogenase/Reductase SDR                                                       | PD246641  |
| 82 | amfb0276                                        | Glutelin                                                                                      | PD192335  |
| 83 | amfb0278                                        | Chromosome III B0361.6, (protein of unknown function DUF171)                                  | PD111934  |
| 84 | amfb0280                                        | Salivary MYS2 precursor signal                                                                | PD997477  |
| 85 | amfb0289                                        | Heavy chain inhibitor inter-alpha-trypsin                                                     | PD017272  |
| 86 | amfb0302                                        | CG12489-PA LD18186P                                                                           | PDA0W1F6  |
| 87 | amfb0307,<br>amfb0646                           | ATP-binding MRP homolog nucleotide-binding binding family ATPase chromosome MRP/NBP35 protein | PD092650  |
| 88 | amfb0311                                        | CG13353-PA                                                                                    | PD315777  |
| 89 | amfb0312                                        | CG1943-PB CG1943-PA                                                                           | PD291962  |
| 90 | amfb0315                                        | DNA Polymerase                                                                                | PD005357  |
| 91 | amfb0323                                        | tRNA Pseudouridine Synthase                                                                   | PD118232  |
| 92 | amfb0342                                        | Dehydrogenase 3-Hydroxy Acyl Co A                                                             | PD466280  |
| 93 | amfb0349                                        | No hits                                                                                       |           |
| 94 | amfb0353                                        | ATP epsilon synthase                                                                          | PD026860  |
| 95 | amfb0372                                        | Oxidoreductase Flavoprotein FAD Dehydrogenase Acyl-COA                                        | PD000558  |
| 96 | amfb0374                                        | No hits                                                                                       |           |

|     |                                   |                                                                                  |          |
|-----|-----------------------------------|----------------------------------------------------------------------------------|----------|
| 97  | amfb0382                          | No hits                                                                          |          |
| 98  | amfb0387                          | Myb, DNA-binding (nuclear factor transcription MYB-1 box binding)                | PD021927 |
| 99  | amfb0389                          | No hits                                                                          |          |
| 100 | amfb0394                          | TDET1 MUS ZGC                                                                    | PD317441 |
| 101 | amfb0396                          | WW/Rsp5/WWP                                                                      | PD354471 |
| 102 | amfb0397                          | No hits                                                                          |          |
| 103 | amfb0398                          | EGF-like immunoglobulin                                                          | PD000227 |
| 104 | amfb0401                          | Eukaryotic initiation factor EIF 3E,                                             | PD336869 |
| 105 | amfb0414                          | CG14147-PA RE16005P                                                              | PD302217 |
| 106 | amfb0422                          | Aldose 1 -Epimerase                                                              | PD127437 |
| 107 | amfb0423                          | Luciferase 4-Monooxygenase                                                       | PD870069 |
| 108 | amfb0430,<br>amfb0108,<br>amfb157 | RNA binding region RNP-1                                                         | PD743635 |
| 109 | amfb0433                          | Epoxide Hydrolase                                                                | PD956892 |
| 110 | amfb0434                          | EGF-Like Tolloid Metalloprotease                                                 | PD719225 |
| 111 | amfb0464                          | CG15092-PA                                                                       | PD491853 |
| 112 | amfb0481                          | Sericin                                                                          | PD018391 |
| 113 | amfb0490                          | No hits                                                                          |          |
| 114 | amfb0492                          | General substrate transporter                                                    | PD602677 |
| 115 | amfb0494                          | Mitochondrial ATP Synthase G subunit                                             | PD015502 |
| 116 | amfb0501                          | CG15678-PA SD16010P                                                              | PD309707 |
| 117 | amfb0504                          | TPR repeat                                                                       | PD000069 |
| 118 | amfb0515                          | Ribosomal transit mitochondrial precursor                                        | PD380986 |
| 119 | amfb0527                          | No hits                                                                          |          |
| 120 | amfb0533                          | No hits                                                                          |          |
| 121 | amfb0537                          | Mob1/phocein                                                                     | PD316458 |
| 122 | amfb0540                          | No hits                                                                          |          |
| 123 | amfb0544                          | Perilipin                                                                        | PD312307 |
| 124 | amfb0562                          | Nucleotidyl- Transferase                                                         | PD000456 |
| 125 | amfb0565                          | No hits                                                                          |          |
| 126 | amfb0574                          | SAICAR Synthetase                                                                | PD656412 |
| 127 | amfb0576                          | Diacylglycerol Kinase                                                            | PD360309 |
| 128 | amfb0577                          | Phosphoribosylformylglycinamide Synthase                                         | PD002258 |
| 129 | amfb0586                          | UPF0066 YAEB VIRR uncharacterized enriched product (protein of unknown function) | PD006705 |
| 130 | amfb0589                          | No hits                                                                          |          |
| 131 | amfb0604                          | Gamma translocon associated subunit                                              | PD103642 |
| 132 | amfb0611                          | RNA binding motif protein 8                                                      | PD328190 |
| 133 | amfb0617                          | No hits                                                                          |          |
| 134 | amfb0618,<br>amfb0824             | Farnesoic acid O-methyltransferase activity                                      | PD293778 |
| 135 | amfb0622                          | No hits                                                                          |          |
| 136 | amfb0625,                         | Ferredoxin                                                                       | PD001472 |

|     |                       |                                                              |          |
|-----|-----------------------|--------------------------------------------------------------|----------|
|     | amfb1187              |                                                              |          |
| 137 | amfb0638,<br>amfb748  | Proteasome component region PCI                              | PD025198 |
| 138 | amfb0643              | Pyruvate Dehydrogenase                                       | PD186280 |
| 139 | amfb0649              | No hits                                                      |          |
| 140 | amfb0653              | Eukaryotic initiation factor EIF 3A                          | PD014437 |
| 141 | amfb0655              | Peptidylprolyl Isomerase, FKBP-type                          | PD000420 |
| 142 | amfb0660              | Ribosomal protein S8E                                        | PD122856 |
| 145 | amfb0665              | No hits                                                      |          |
| 146 | amfb0696              | Death-associated CG12384-PA DAP-1                            | PD068445 |
| 147 | amfb0699              | Group XII secretory Phospholipase A2                         | PD386805 |
| 148 | amfb0704              | No hits                                                      |          |
| 149 | amfb0708              | Glycoprotein                                                 | PD722012 |
| 150 | amfb0714              | Mnd1                                                         | PD110859 |
| 151 | amfb0722              | GTP-CH-I Cyclohydrolase                                      | PD101974 |
| 152 | amfb0731              | Intracellular chloride channel                               | PD706961 |
| 153 | amfb0742              | No hits                                                      |          |
| 154 | amfb0757              | Peptidase, cysteine peptidase active site                    | PD585084 |
| 155 | amfb0759              | Exonuclease                                                  | PD004947 |
| 156 | amfb0768              | CG17233-PA CG17233-PC                                        | PD719922 |
| 157 | amfb0771              | CG11876-PB CG11876-PC                                        | PD807738 |
| 158 | amfb0777              | Acireductone Dioxygenase, ARD                                | PD006219 |
| 159 | amfb0778              | DCP1-like decapping                                          | PD129069 |
| 160 | amfb0784              | Adenosine Deaminase/editase                                  | PD003961 |
| 160 | amfb0789              | Surface ookinete antigen PFS28                               | PD008013 |
| 161 | amfb0801              | Phenylalanine-4-Hydroxylase, Amino acid-binding ACT          | PD973163 |
| 162 | amfb0812              | No hits                                                      |          |
| 163 | amfb0817              | Ubiquitin                                                    | PD000119 |
| 164 | amfb0821              | Immunoglobulin-like                                          | PD328728 |
| 165 | amfb0856              | No hits                                                      |          |
| 166 | amfb0866              | TMS membrane protein/tumour differentially expressed protein | PD593607 |
| 167 | amfb0873              | Serine-Hydroxymethyl Transferase                             | PD498026 |
| 168 | amfb0893              | No hits                                                      |          |
| 169 | amfb0895              | No hits                                                      |          |
| 170 | amfb0896,<br>amfb0480 | Aminotransferase, class V                                    | PD661108 |
| 171 | amfb0907              | No hits                                                      |          |
| 172 | amfb0911,<br>amfb1200 | Adenosine/AMP deaminase                                      | PD008716 |
| 173 | amfb0913              | No hits                                                      |          |
| 174 | amfb0916              | No hits                                                      |          |
| 175 | amfb0923              | Sec61_beta                                                   | PD721750 |

|     |          |                                                                                              |          |
|-----|----------|----------------------------------------------------------------------------------------------|----------|
| 176 | amfb0938 | No hits                                                                                      |          |
| 177 | amfb0945 | CG33290-PA CG14567-PA                                                                        | PD308577 |
| 178 | amfb0953 | No hits                                                                                      |          |
| 179 | amfb0971 | Acyl- CoA- binding protein, ACBP                                                             | PD351532 |
| 180 | amfb0975 | No hits                                                                                      |          |
| 181 | amfb0984 | Nascent polypeptide-associated complex NAC                                                   | PD009422 |
| 182 | amfb0994 | No hits                                                                                      |          |
| 183 | amfb1000 | No hits                                                                                      |          |
| 184 | amfb1011 | No hits                                                                                      |          |
| 185 | amfb1012 | ATP-binding RNA hydrolase                                                                    | PD410733 |
| 186 | amfb1014 | Calponin repeat muscle actin-binding smooth<br>multigene Calmodulin-binding family homologue | PD105641 |
| 187 | amfb1028 | No hits                                                                                      |          |
| 189 | amfb1035 | FMTB wall peptidoglycan-anchor cell                                                          | PD851216 |
| 190 | amfb1038 | Carboxylesterase, type B                                                                     | PD000605 |
| 191 | amfb1039 | No hits                                                                                      |          |
| 192 | amfb1052 | Mov34/MPN/PAD-1                                                                              | PD363422 |
| 193 | amfb1056 | No hits                                                                                      |          |
| 194 | amfb1087 | No hits                                                                                      |          |
| 195 | amfb1093 | Tudor domain containing repeat Kinase                                                        | PD291106 |
| 196 | amfb1099 | No hits                                                                                      |          |
| 197 | amfb1123 | Lysozyme C Hydrolase                                                                         | PD000577 |
| 198 | amfb1134 | Heat shock CG6000-PA RH54517P 67B2<br>CG12279-PA                                             | PD687240 |
| 199 | amfb1135 | TIA-1 homologue                                                                              | PD978935 |
| 200 | amfb1149 | CG3706-PA SD20854P C05D2.8 EG:<br>BACR7A4.20                                                 | PD104297 |
| 201 | amfb1162 | No hits                                                                                      |          |
| 202 | amfb1167 | CG5080-PB LD34147P CG5080-PA                                                                 | PD324947 |
| 203 | amfb1170 | CG3884-PA CG32633-PA RE21371P<br>ENSANGP00000022546 IB1                                      | PD293778 |
| 204 | amfb1212 | CG6513-PA CG6513-PB                                                                          | PDA125G1 |
| 205 | amfb1220 | Cys/Met metabolism Pyridoxal-phosphate-<br>dependent enzymes                                 | PD590311 |
| 206 | amfb1254 | No hits                                                                                      |          |
| 207 | amfb1273 | No hits                                                                                      |          |
| 208 | amfb1276 | No hits                                                                                      |          |
| 209 | amfb1281 | No hits                                                                                      |          |
| 210 | amfb1289 | Fibronectin, type III                                                                        | PD360479 |
| 211 | amfb1296 | No hits                                                                                      |          |
| 212 | amfb1297 | Serine spondin repeat                                                                        | PD218985 |
| 213 | amfb1298 | No hits                                                                                      |          |
| 214 | amfb1304 | No hits                                                                                      |          |
| 215 | amfb1308 | Sin3 associated polypeptide p18                                                              | PD016033 |
| 216 | amfb1312 | Leucine-rich repeat                                                                          | PD606902 |

|     |                       |                                                                           |                       |
|-----|-----------------------|---------------------------------------------------------------------------|-----------------------|
| 217 | amfb1317              | No hits                                                                   |                       |
| 218 | amfb1329              | Alpha Amylase, catalytic region                                           | PD479378              |
| 219 | amfb1331,<br>amfb0488 | Nuclear ATP-Binding                                                       | PD023569              |
| 220 | amfb1332              | No hits                                                                   |                       |
| 221 | amfb1334,<br>amfb0475 | 14-3-3 like Acetylation Phophorylation factor                             | PD000600              |
| 222 | amfb1355              | Phospholipase/Carboxylesterase                                            | PD352911              |
| 223 | amfb1356              | No hits                                                                   |                       |
| 224 | amfb1363,<br>amfb0541 | Alcohol Dehydrogenase super, zinc-containing                              | PD002174,<br>PD506568 |
| 225 | amfb1366              | Hydrolase CDS L-Homocystein S-Adenosyl<br>ORFs(Glycosyl transferase 8 )   | PD125323              |
| 226 | amfb1370              | No hits                                                                   |                       |
| 227 | amfb1373              | Protein of unknown function DUF1319 (ORF1 I<br>polyprotein 12and CDS DNA) | PD087208,             |
| 228 | amfb1395              | Ribosomal peptide MRP-S26                                                 | PD423119              |
| 229 | amfb1402              | Integrase                                                                 | PD107985              |
