# Supplementary material for: Analysis of bacteria-challenged wild silkmoth, Antheraea mylitta (lepidoptera) transcriptome reveals potential immune genes
Source: PubMed Central journal article supplement (PMC1559613; doi:10.1186/1471-2164-7-184), 2006-07-21
Supplement: 1471-2164-7-184-S3.pdf [file 1471-2164-7-184-S3.pdf]

**Additional data file 3: A subset of the putative immune genes from the *A. mylitta* transcriptome.**

The probable function was assigned based on the homology in NCBI-BLAST.

A.p - *Antheraea pernyi*, S.c.r - *Samia cynthia ricini*, H.c - *Hyalophora cecropia*, H.a - *Helicoverpa armigera*, M.s.- *Manduca sexta*, B.m- *Bombyx mori*, L.o - *Lonomia obliqua*, T.n - *Trichoplusia ni*, P.x.- *Plutella xylostella*, C.s.- *Culicoides sonorensis*.

| <b>GenBank accession no.</b> | <b>Nucleotide</b> | <b>E value</b> | <b>Homology</b>           | <b>Putative function</b> |
|------------------------------|-------------------|----------------|---------------------------|--------------------------|
| DQ666488                     | 977               | 5e-103         | Basic attacin (A.p)       | Anti-microbial           |
| DQ666489                     | 984               | 6e-76          | Attacin (S.c.r)           | Anti-microbial           |
| DQ666490                     | 429               | 3e-30          | Basic attacin (A.p)       | Anti-microbial           |
| DQ666491                     | 924               | e-111          | Attacin E precursor (H.c) | Anti-microbial           |
| DQ666492                     | 1088              | 5e-16          | Cecropin (H.a)            | Anti-microbial           |
| DQ666493                     | 1642              | 4e-15          | Cecropin D (H.c)          | Anti-microbial           |
| DQ666494                     | 429               | 2e-16          | Cecropin D (H.c)          | Anti-microbial           |
| DQ666495                     | 593               | 1e-66          | Gloverin (M.s)            | Anti-microbial           |
| DQ666496                     | 529               | 8e-54          | Gloverin (M.s)            | Anti-microbial           |
| DQ666497                     | 1425              | 0.0            | Hemolin (A.p)             | Recognition protein      |
| DQ666498                     | 663               | 2e-88          | Hemolin precursor (H.c)   | Recognition protein      |
| DQ666499                     | 1145              | 2e-54          | Lebocin (S.c.r)           | Anti-microbial           |
| DQ666500                     | 594               | 8e-11          | Lebocin 4 precursor (B.m) | Anti-microbial           |

|          |     |       |                                            |                           |
|----------|-----|-------|--------------------------------------------|---------------------------|
| DQ666501 | 713 | 6e-63 | Hypothetical protein (S.c.r)               | Anti-microbial            |
| DQ666502 | 539 | 4e-50 | Hypothetical protein (S.c.r)               | Anti-microbial            |
| DQ666503 | 522 | 4e-04 | Defense protein 4 (L.o)                    | Unknown                   |
| DQ666504 | 946 | 2e-47 | Lectin 3 (L.o)                             | Recognition protein       |
| DQ666505 | 677 | 1e-70 | Peptidoglycan recognition protein (T.n)    | Recognition protein       |
| DQ666506 | 671 | 2e-82 | Peptidoglycan recognition protein 1A (M.s) | Recognition protein       |
| DQ666507 | 942 | 2e-66 | Serpin 2 (L.o)                             | Serine protease inhibitor |
| DQ666508 | 399 | 8e-21 | Serpin 2 (L.o)                             | Serine protease inhibitor |
| DQ666509 | 607 | 1e-70 | Serpin 2 (L.o)                             | Serine protease inhibitor |
| DQ666510 | 403 | 4e-40 | Serine protease inhibitor 4 (L.o)          | Serine protease inhibitor |
| DQ666511 | 461 | 1e-40 | Serpin 3 (L.o)                             | Serine protease inhibitor |
| DQ666512 | 301 | 9e-11 | Serpin 2 (B.m)                             | Serine protease inhibitor |
| DQ666513 | 668 | 1e-35 | Serpin 1 (P.x)                             | Serine protease inhibitor |
| DQ666514 | 556 | 2e-77 | Serpin 6 (M.s))                            | Serine protease inhibitor |
| DQ666515 | 448 | 6e-16 | Protease inhibitor 1 (L.o)                 | Protease inhibitor        |
| DQ666516 | 377 | 5e-12 | Protease inhibitor 3 (L.o)                 | Protease inhibitor        |
| DQ666517 | 485 | 6e-16 | Protease inhibitor 1 (L.o)                 | Protease inhibitor        |
| DQ666518 | 584 | 2e-17 | Protease inhibitor 1 (L.o)                 | Protease inhibitor        |

|          |     |       |                                       |                    |
|----------|-----|-------|---------------------------------------|--------------------|
| DQ666519 | 615 | 5e-06 | Protease inhibitor 1 (L.o)            | Protease inhibitor |
| DQ666520 | 579 | 2e-28 | Protease inhibitor 6 (L.o)            | Protease inhibitor |
| DQ666521 | 569 | 2e-28 | Protease inhibitor 6 (L.o)            | Protease inhibitor |
| DQ666522 | 592 | 3e-07 | Thiol protease-like (C.s)             | Protease inhibitor |
| DQ666523 | 400 | 3e-08 | Silk proteinase inhibitor (B.m)       | Protease inhibitor |
| DQ666524 | 548 | 1e-36 | Kazal-type proteinase inhibitor (M.s) | Protease inhibitor |
| DQ666525 | 940 | 4e-04 | Seroin 2 (B.m)                        | Antimicrobial      |
