# Supplementary material for: Analysis of bacteria-challenged wild silkmoth, Antheraea mylitta (lepidoptera) transcriptome reveals potential immune genes
Source: PubMed Central journal article supplement (PMC1559613; doi:10.1186/1471-2164-7-184), 2006-07-21
Supplement: 1471-2164-7-184-S4.pdf [file 1471-2164-7-184-S4.pdf]

**Additional data file 4: Proteins similar to DFPs as determined by protein BLAST in NCBI. The *B. mori* proteins similar to DFPs were obtained by blastp analysis at the website-<http://silkworm.genomics.org.cn/>. The corresponding gene number has been mentioned. The hits were grouped into 3 categories based on their origin - lepidopteran insects, insects other than Lepidoptera and vertebrates**

| PROTE-IN        | LEPIDOPTERA                                                        |          |                                   | OTHER INSECTS                               |                     |                                    | VERTEBRATES                                   |                                            |                       |
|-----------------|--------------------------------------------------------------------|----------|-----------------------------------|---------------------------------------------|---------------------|------------------------------------|-----------------------------------------------|--------------------------------------------|-----------------------|
|                 | Organism                                                           | Function | Accession No.                     | Name                                        | Function            | Accession No.                      | Name                                          | Function                                   | Accession No.         |
| DFP-1,<br>DFP-3 | <i>B. mori</i><br><i>Samia cynthia ricini</i><br><i>L. obliqua</i> | Unknown  | Bmb041147<br>BAD05929<br>AAV91350 | <i>A. gambiae</i><br><i>D. melanogaster</i> | Unknown             | ENSANGP0000000<br>354<br>CG8399-PA | <i>Pan troglodytes</i><br><i>Mus musculus</i> | Predicted-stromal cell receptor factor - 2 | XP_517470<br>AAH27770 |
| DFP-2           | <i>B. mori</i><br>Rest same as DFP-1 and 3.                        | Unknown  | Bmb024557                         | Same as DFP-1 and 3                         | Same as DFP-1 and 3 | Same as DFP-1 and 3                | Same as DFP-1 and 3                           | Same as DFP-1 and 3                        | Same as DFP-1 and 3   |
| DFP-4           | <i>L. obliqua</i><br><i>B. mori</i><br><i>H. armigera</i>          | Cecropin | AAV91462<br>BAE53371<br>AAX51193  | None                                        | -                   | -                                  | No significant similarity                     | -                                          | -                     |
