# Supplementary material for: Analysis of bacteria-challenged wild silkmoth, Antheraea mylitta (lepidoptera) transcriptome reveals potential immune genes
Source: PubMed Central journal article supplement (PMC1559613; doi:10.1186/1471-2164-7-184), 2006-07-21
Supplement: 1471-2164-7-184-S5.pdf [file 1471-2164-7-184-S5.pdf]

**Additional data file 5: Primer sequences used for RT-PCR profile. \* GenBank accession numbers are not available for these sequences, which can be accessed at <http://210.212.212.7:9999/PHP/SILKSAT/uniqueseqs/>.**

| <b>Gene</b>                 | <b>GenBank accession number</b> | <b>Forward primer (5'-3')</b> | <b>Reverse primer (5'-3')</b> |
|-----------------------------|---------------------------------|-------------------------------|-------------------------------|
| <i>Attacin1</i>             | DQ666490                        | TTCCACCCTGCGTTAAAGTC          | ACAGAATCGGTGCATCAGC           |
| <i>Attacin 2*</i>           | amfb1278                        | CGGCGAGCTGGTAAAGTATC          | CAGAACCGATTGCGCTTAAC          |
| <i>Cecropin1</i>            | DQ666492                        | TCGATGCCTACAGTTTCGAG          | CTTCCTGTTTCGTTTGCCTTC         |
| <i>Cecropin 2</i>           | DQ666493                        | CTTCCCTTTAGCCAATGCTG          | TGTTGTTTCGATTTCGCTTGC         |
| <i>DFP-1</i>                | DQ666501                        | TTGTCCGCTGACTCAGAATG          | TACAATCAGCGGCAAGACAC          |
| <i>DFP-4</i>                | DQ666503                        | TCGTTTCGACAGAACTTGAAGG        | TCAGATTTGTTTGCCGCTG           |
| <i>Gloverin</i>             | DQ666495                        | TGCCTCCTGGATACGAAAAG          | TTACCGAATAACCCGTCGTC          |
| <i>Hemolin</i>              | DQ666498                        | CTGACGGAAACCTCAGCTTC          | TGGCACTTCTTCATCGACAG          |
| <i>Lebocin 1</i>            | DQ666499                        | AACAGCCATAACGGTTCGTC          | TTGGTCGTCGATACGACTTG          |
| <i>Lebocin 2</i>            | DQ666500                        | GAAGGCAAGCTTGAGTGGTC          | CCTCAGTGTGTTTCGTGCAG          |
| <i>Lectin</i>               | DQ666504                        | CGTGCGACGATGTATTTGAG          | GTCCGAACCGATGAAACTTG          |
| <i>PGRP-1</i>               | DQ666506                        | ACGAAGGATCTGGTTGGTTG          | ACGCCGCATCTAAGTAAAGC          |
| <i>PGRP-2*</i>              | amfbc0145                       | AACCTCAACGTGACCAGGAC          | GCAGCACACGTGAGCAATAC          |
| <i>Seroiin</i>              | DQ666525                        | TGATGTTCCCTATGCCACAC          | ACCGGAGAAATGTTTCGTTTG         |
| <i>Serpin*</i>              | amfb0553                        | TGACTTTGGGTGCAACTGAC          | ATGCATATGGTCCCTCGTTC          |
| <i>Proteinase inhibitor</i> | DQ666519                        | GACCGTTAATGGCTGCAATC          | CTTGCCGGTATCATTTCAG           |
| <i>Actin</i>                |                                 | GGCATGGGACAGAAGGACT           | TAGTGACGATTCCGTGTTTCG         |
